# Supplementary material
Source: publisher figshare collection journal article supplement (https://acs.figshare.com/ndownloader/files/23715293)
Supplement: Supplementary file 1 [file 23715293]

## SUPPLEMENTARY DATA

### A two-way interaction between methotrexate and the gut microbiota of male Sprague Dawley rats

*Marine P. M. Letertre<sup>1,\*</sup>, Nyasha Munjoma<sup>2</sup>, Kate Wolfer<sup>1</sup>, Alexandros*

*Pechlivanis<sup>1,3,4</sup>, Julie A. K. McDonald<sup>1</sup>, Rhiannon N. Hardwick<sup>5</sup>, Nathan J.*

*Cherrington<sup>5</sup>, Muireann Coen<sup>1,6</sup>, Jeremy K. Nicholson<sup>7</sup>, Lesley Hoyles<sup>1,8</sup>, Jonathan*

*R. Swann<sup>1</sup>, Ian D. Wilson<sup>1</sup>.*

1. Imperial College, London, SW7 2AZ, UK

2. Waters Corporation, Wilmslow, SK9 4AX, UK.

3. Center for Interdisciplinary Research of the Aristotle University of Thessaloniki (KEDEK), 57001 Thessaloniki, Greece.

4. Department of Chemistry, Aristotle University of Thessaloniki, 54124 Thessaloniki, Greece

5. Department of Pharmacology and Toxicology, College of Pharmacy, University of Arizona, Tuscon, Arizona, USA.
6. Oncology Safety, Clinical Pharmacology & Safety Sciences, R&D, Astra Zeneca, Cambridge.
7. Australian National Phenome Centre, Health Futures Institute, Murdoch University, Murdoch, WA6150, Australia.
8. Department of Biosciences, Nottingham Trent University, Nottingham, NG11 8NS, UK.

Corresponding authors\*E-mail: [marine.letertre@biogenouest.org](mailto:marine.letertre@biogenouest.org) \*E-mail:

[i.wilson@imperial.ac.uk](mailto:i.wilson@imperial.ac.uk)

## Contents

### R Script for feature removal

**Figure S1.** Screenshot of TargetLynx V4.1 showing the three calibration curves for MTX, DAMPA and 7-OH-MTX used during the faecal sample analysis.

**Figure S2.** PCA score plots of the urine metabolic profile, plotted according the dose of MTX administrated.

**Figure S3.** CA-PLS-R (covariate-adjusted projection to latent structures regression) analysis performed on the urine samples over the time points 0, 12, 24 and 48h for each of the MTX dose- groups.

**Figure S4.** Skyline significance of the CA-PLS-Regression models, performed on the urine samples for each of the MTX dose groups (0, 10, 40 and 100 mg/kg), representing the number of features having a q-value less than 0.05 and which significantly increased (red colour) or decreased (blue colour) over time (0, 12, 24 and 48h).

**Figure S5.** PCA score plots of the faecal metabolic profiles plotted according the dose of MTX administered.

**Figure S6.** CA-PLS-R (covariate-adjusted projection to latent structures regression) analysis performed over time (0, 12 and 48h) on the faecal samples of each of the MTX dose groups.

**Figure S7.** Skyline significance of the CA-PLS-Regression models, performed on faecal samples for each of the MTX dose groups (0, 10, 40 and 100 mg/kg), representing the number of features having a q-value lower than 0.05 and which significantly increased (red colour) or decreased (blue colour) over time (0, 12 and 48h).

**Figure S8.**  $\beta$  diversity represented using PCoA of Bray-Curtis distance, displaying the similarity between the samples.

**Figure S9.** Correlogram integrating the putatively annotated endogenous compounds excreted in urine and feces samples of the animals pre-MTX treatment with MTX concentration measured in urine at 6-12 h and in feces at 36-48 h, as well as the quantity of DAMPA excreted in feces samples at 36-48 h.

**Table S1.** Number of reads per samples after 16S rRNA gene sequencing pre-processing and prior importation into phyloseq for data investigation.

**Table S2.** Putative annotations for metabolites detected in the urine samples.

**Table S3.** Putative annotations for metabolites detected in the faecal samples.

**Table S4.**  $\alpha$  diversity values representing the microbial richness of each of the faecal samples of the animals according the MTX dose groups over time.

#### **R script for Feature Removal:**

The following script was used to remove LC-MS-detected features that were found by multivariate statistical analysis to be significantly changed overtime in the control groups, and therefore unrelated to MTX exposure, from the significant features changed in the MTX-dosed groups.

```
setwd("...")  
  
X <- read.csv("Matrice.csv", header = TRUE)  
  
X.2 <- X[!X$m.z %in% X$m.z[X$Group == "Control"], ]  
  
write.csv(X.2, file= "Matrice_minus_control.csv")
```

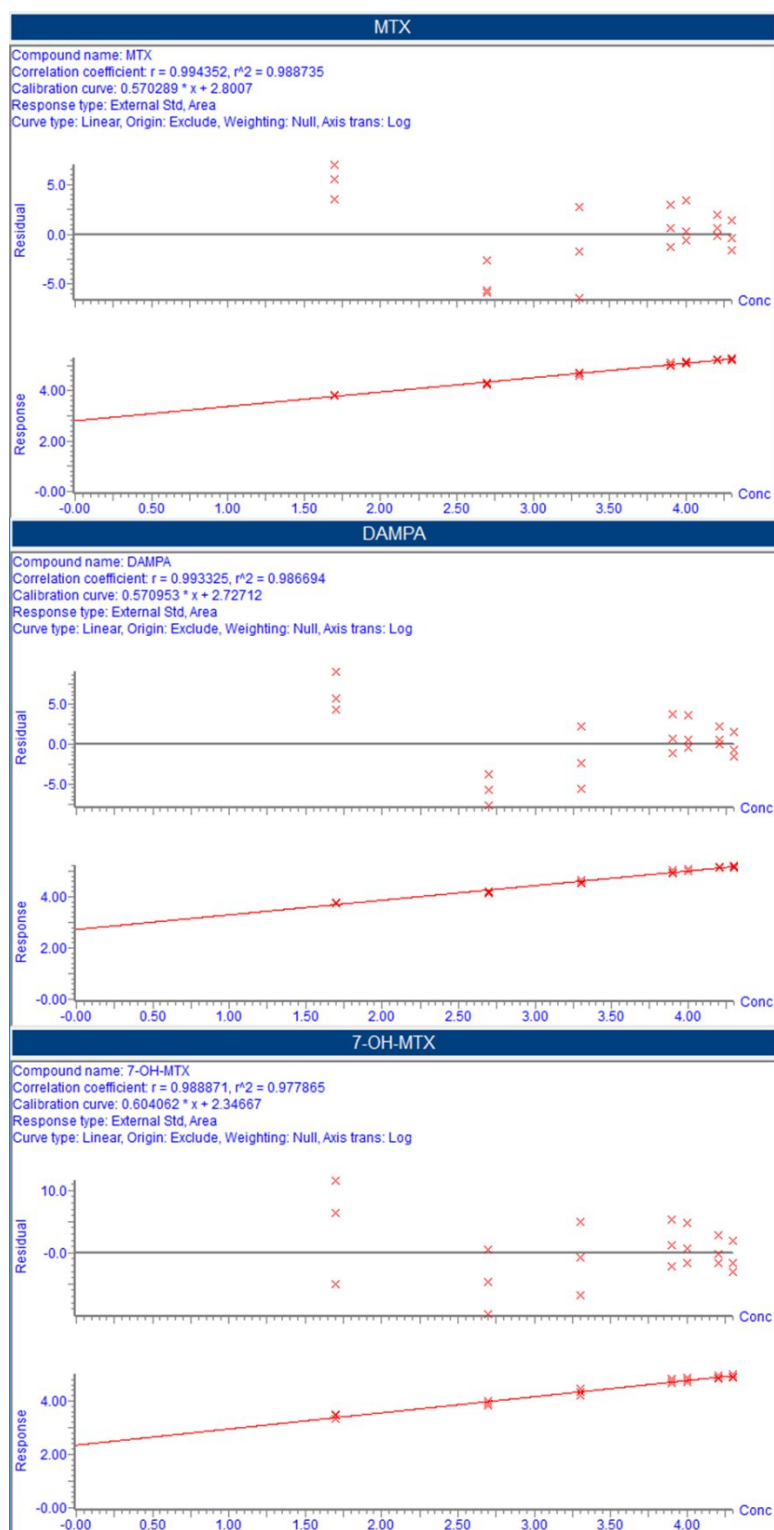

**Figure S1.** Screenshot of TargetLynx V4.1 showing the three calibration curves for MTX, DAMPA and 7-OH-MTX used during the faecal sample analysis. Linear curve with log axis was used, all the  $R^2$  for each of the standards for both the urine and the faecal samples were superior to 0.97.



**Time effect**

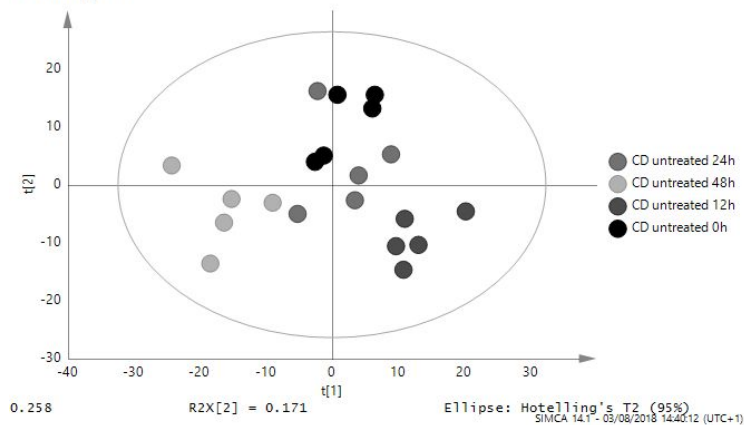

**10 mg/kg**

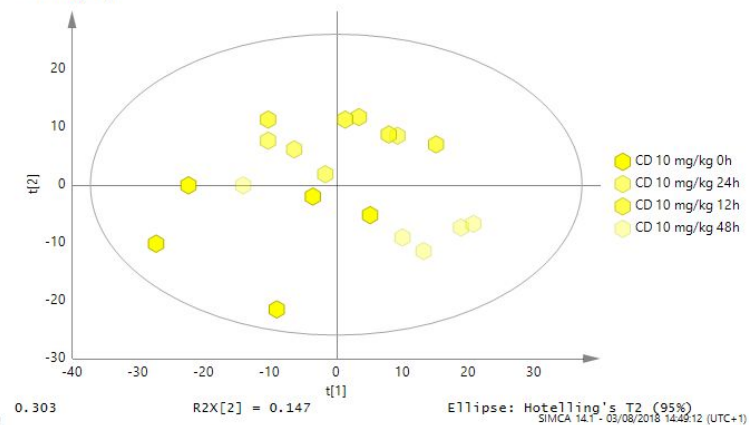

**40 mg/kg**

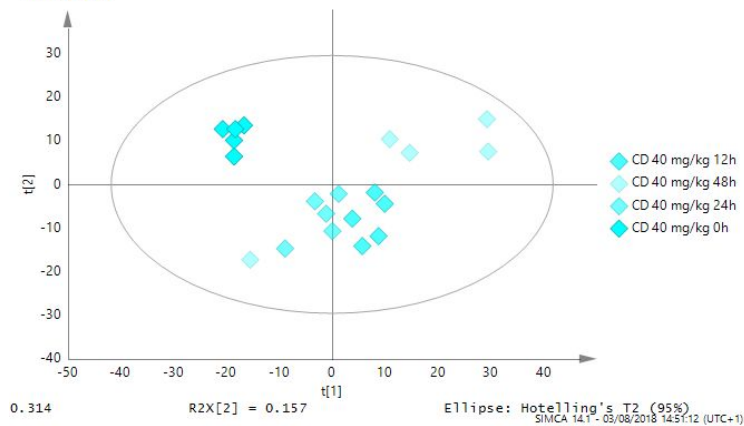

**100 mg/kg**

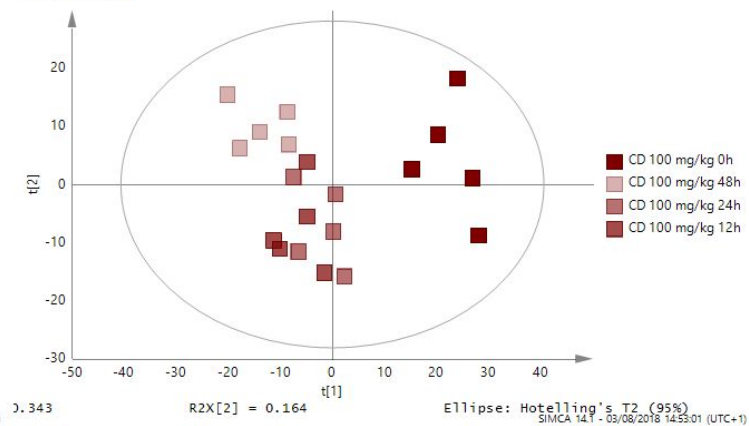

**Figure S2.** PCA score plots of the urine metabolic profile, plotted according the dose of MTX administrated. Control are indicated by black/grey circles and 10, 40 or 100 mg/kg are indicated by yellow hexagons, blue diamonds, dark red boxes respectively. A colour intensity gradation for each colour indicates the different time-periods as indicated in the key.



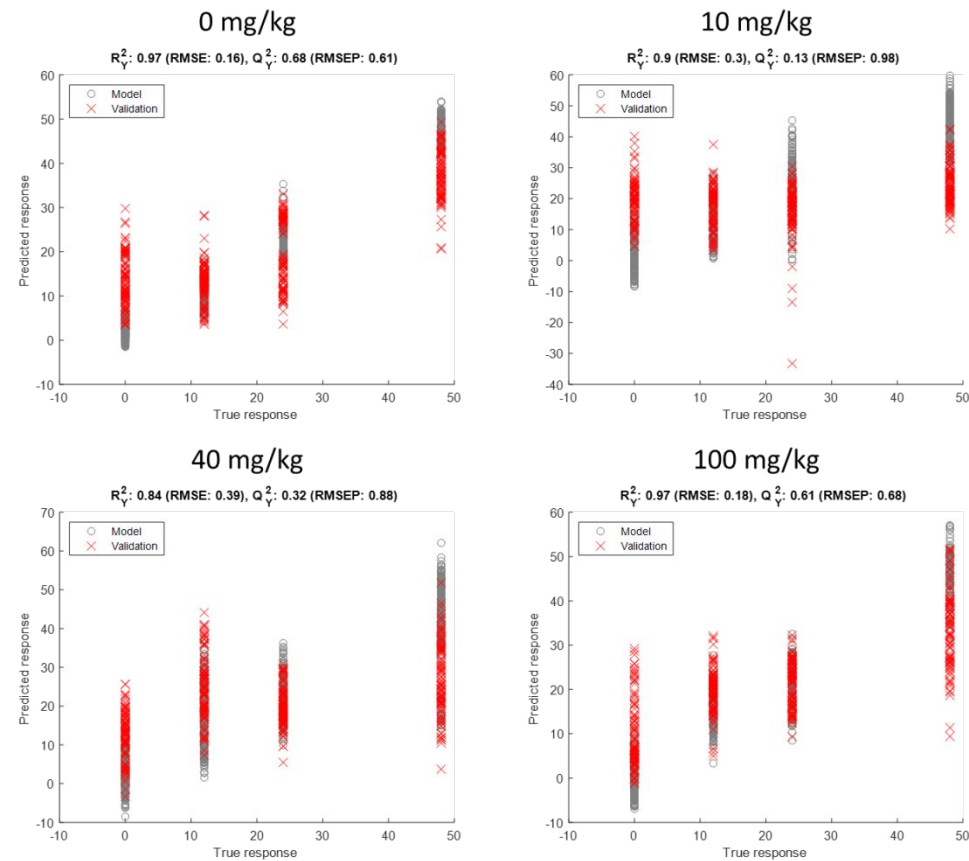

**Figure S3.** CA-PLS-R (covariate-adjusted projection to latent structures regression) analysis performed on the urine samples over the time points 0, 12, 24 and 48h for each of the MTX dose- groups. R2Y indicates the goodness of fit for the model of the data, the

Q2Y how well the model predicts the data. RMSE and RMSEP represent the root mean squared error and the root mean squared error of the prediction respectively. The model set is represented by grey circles and the predicted ones by red crosses.

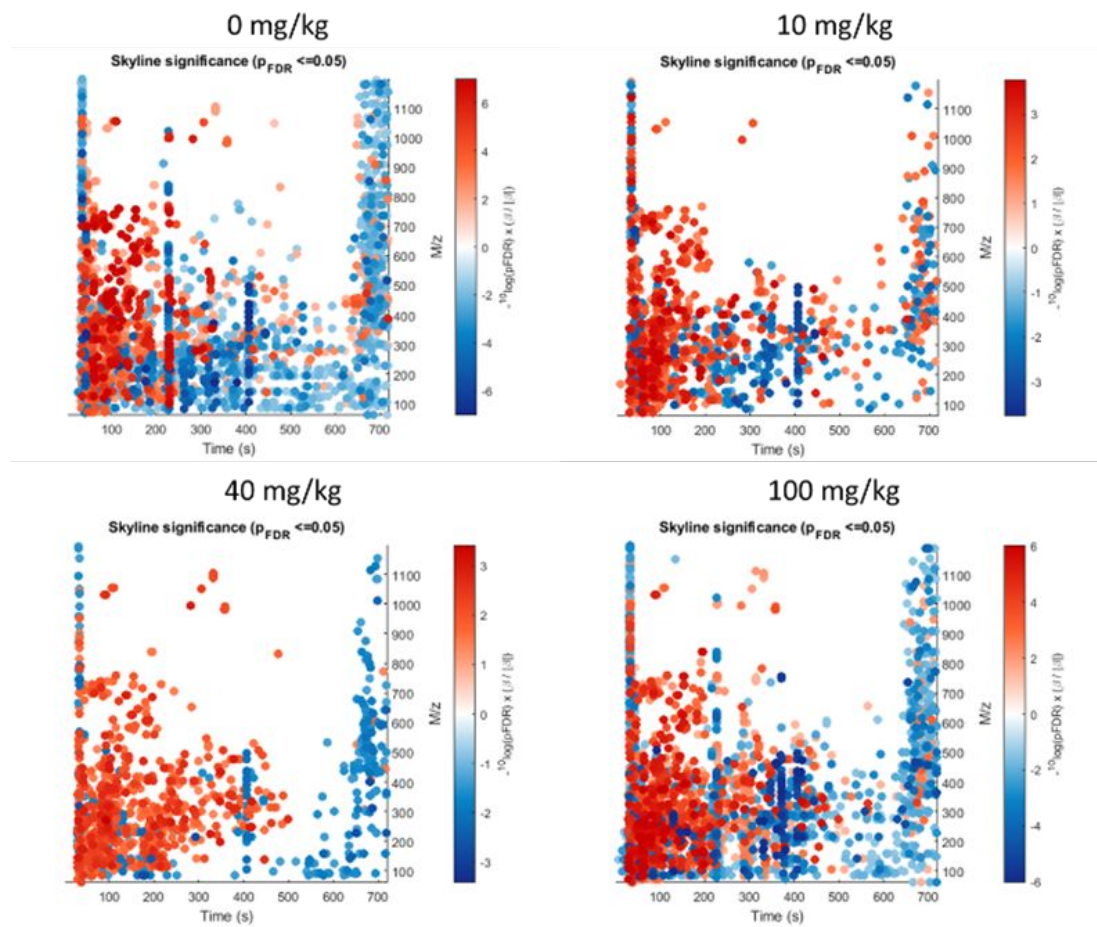

**Figure S4.** Skyline significance of the CA-PLS-Regression models, performed on the urine samples for each of the MTX dose groups (0, 10, 40 and 100 mg/kg), representing the number of features having a q-value less than 0.05 and which significantly increased (red colour) or decreased (blue colour) over time (0, 12, 24 and 48h).

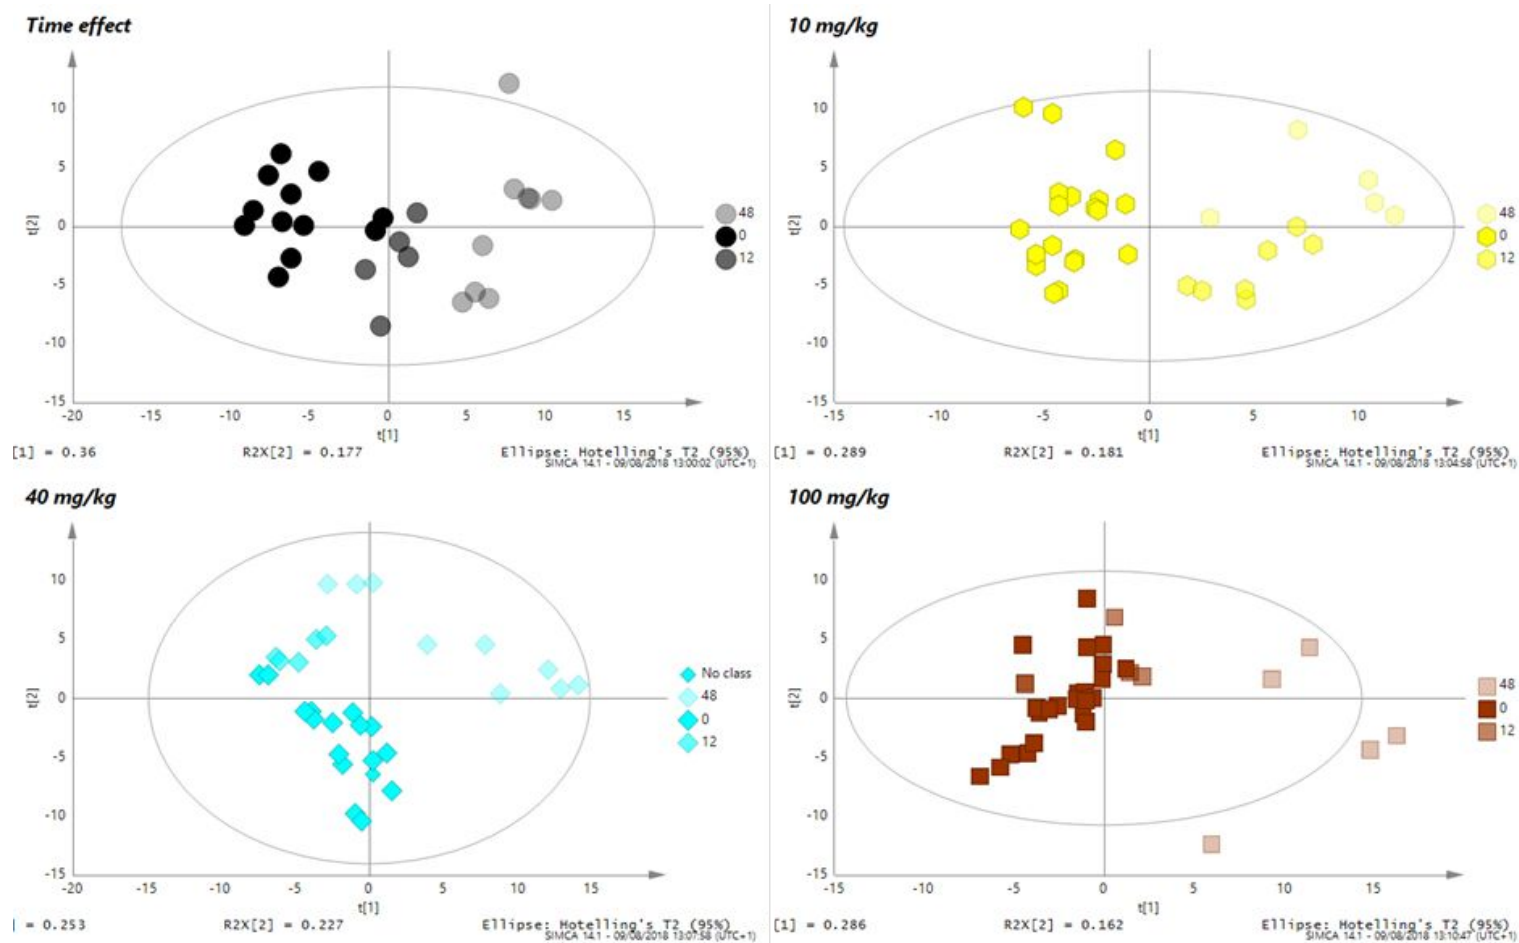

**Figure S5.** PCA score plots of the faecal metabolic profiles plotted according the dose of MTX administered. The undosed controls are indicated by black/grey circles and the animal groups treated with 10, 40 or 100 mg/kg are indicated by yellow hexagons, blue

diamonds, dark red boxes respectively. A colour intensity gradation for each colour indicates the different time-periods as indicated in the key.

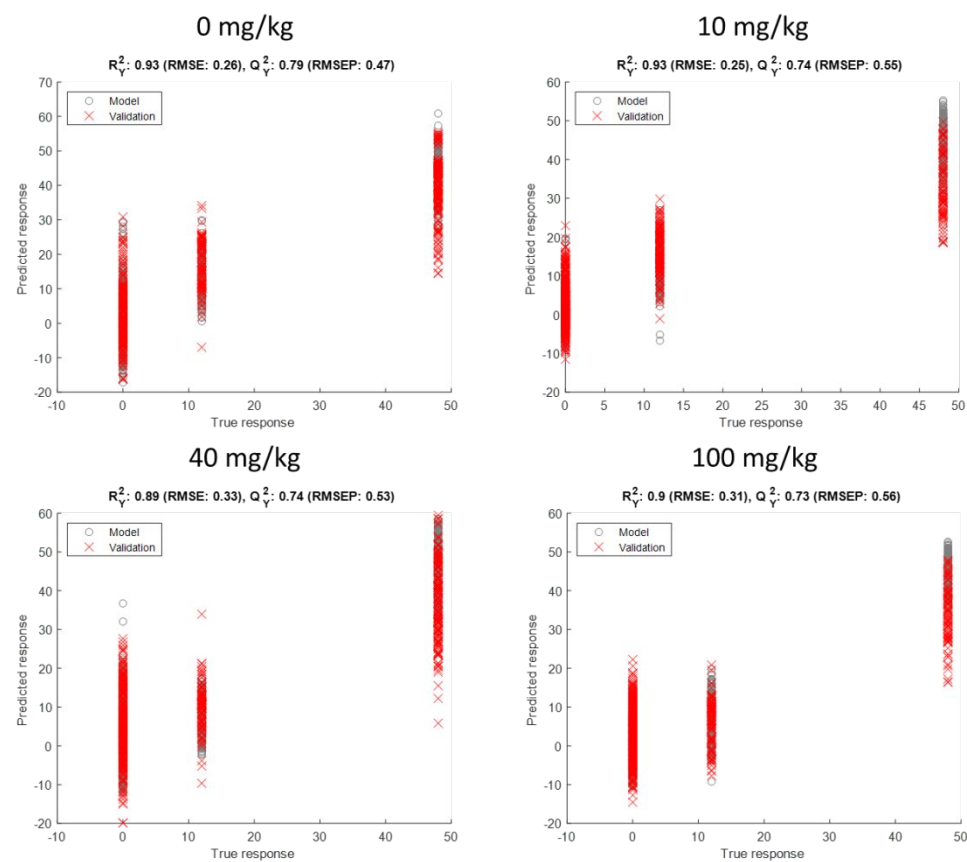

**Figure S6.** CA-PLS-R (covariate-adjusted projection to latent structures regression) analysis performed over time (0, 12 and 48h) on the faecal samples of each of the MTX dose groups. R<sup>2</sup><sub>Y</sub> indicate how well the model fits the data, the Q<sup>2</sup><sub>Y</sub> how well the model predicts the data. RMSE and RMSEP represent the root mean squared error and the root mean squared error of the prediction respectively. The model set is represented by grey circles and the predictions by red crosses.

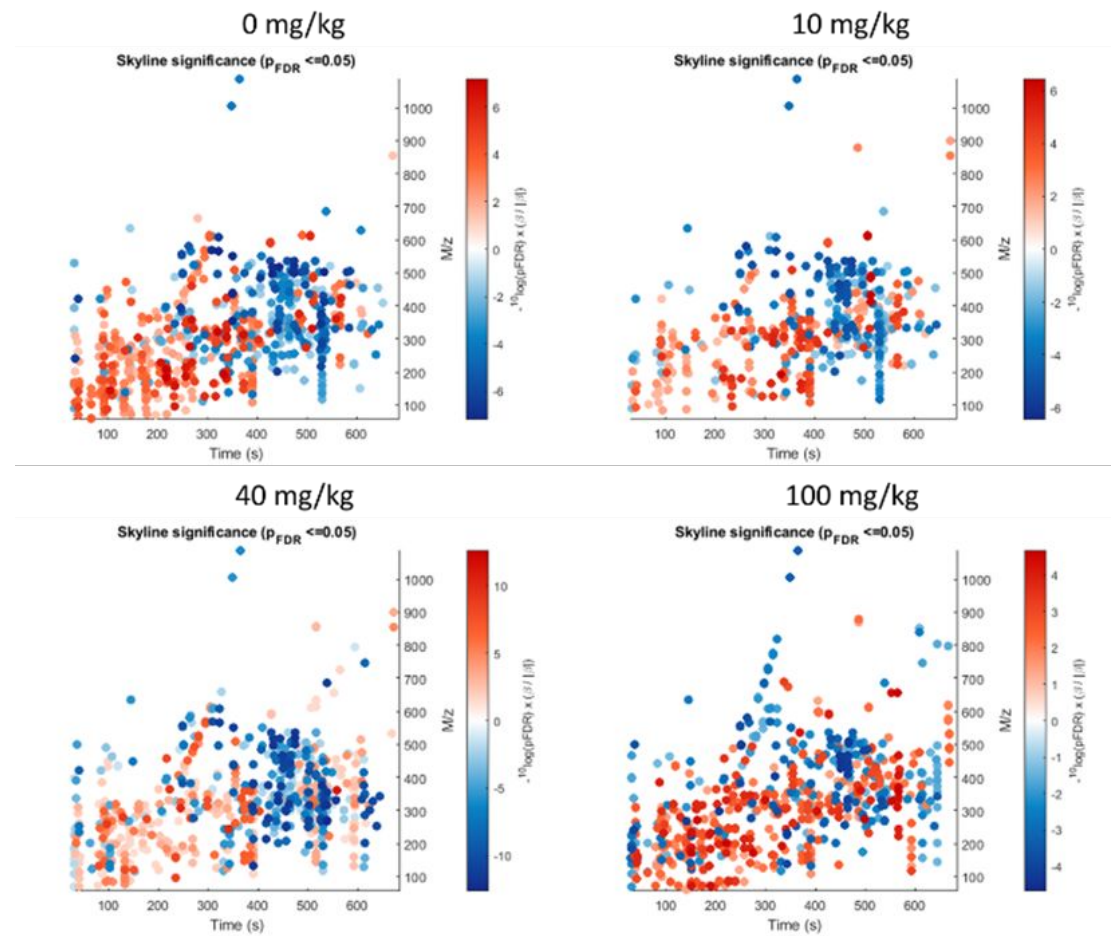



**Figure S7.** Skyline significance of the CA-PLS-Regression models, performed on faecal samples for each of the MTX dose groups (0, 10, 40 and 100 mg/kg), representing the number of features having a q-value lower than 0.05 and which significantly increased (red colour) or decreased (blue colour) over time (0, 12 and 48h).

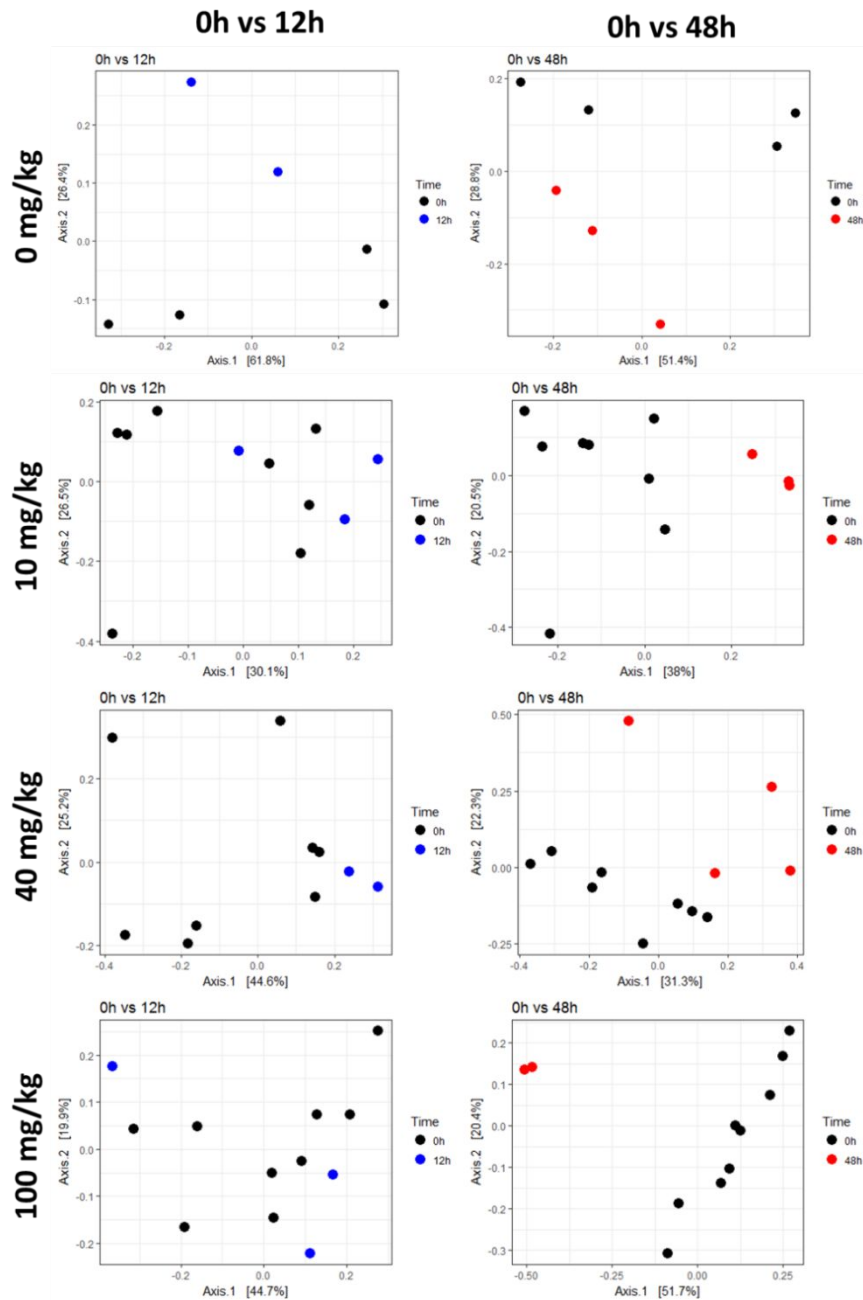

**Figure S8.**  $\beta$  diversity represented using PCoA of Bray-Curtis distance, displaying the similarity between the samples. For the untreated animals, N = 4 at 0 h, N = 2 at 12 h and N = 3 at 48 h; for the animals which received a dose of 10 mg/kg, N = 8 at 0 h, N = 3 at 12 h and N = 3 at 48 h; for the animals which received a dose of 40 mg/kg, N = 8 at 0 h, N = 2 at 12 h and N = 4 at 48 h; for the animals which received a dose of 100 mg/kg, N = 9 at 0 h, N = 3 at 12 h and N = 2 at 48 h.

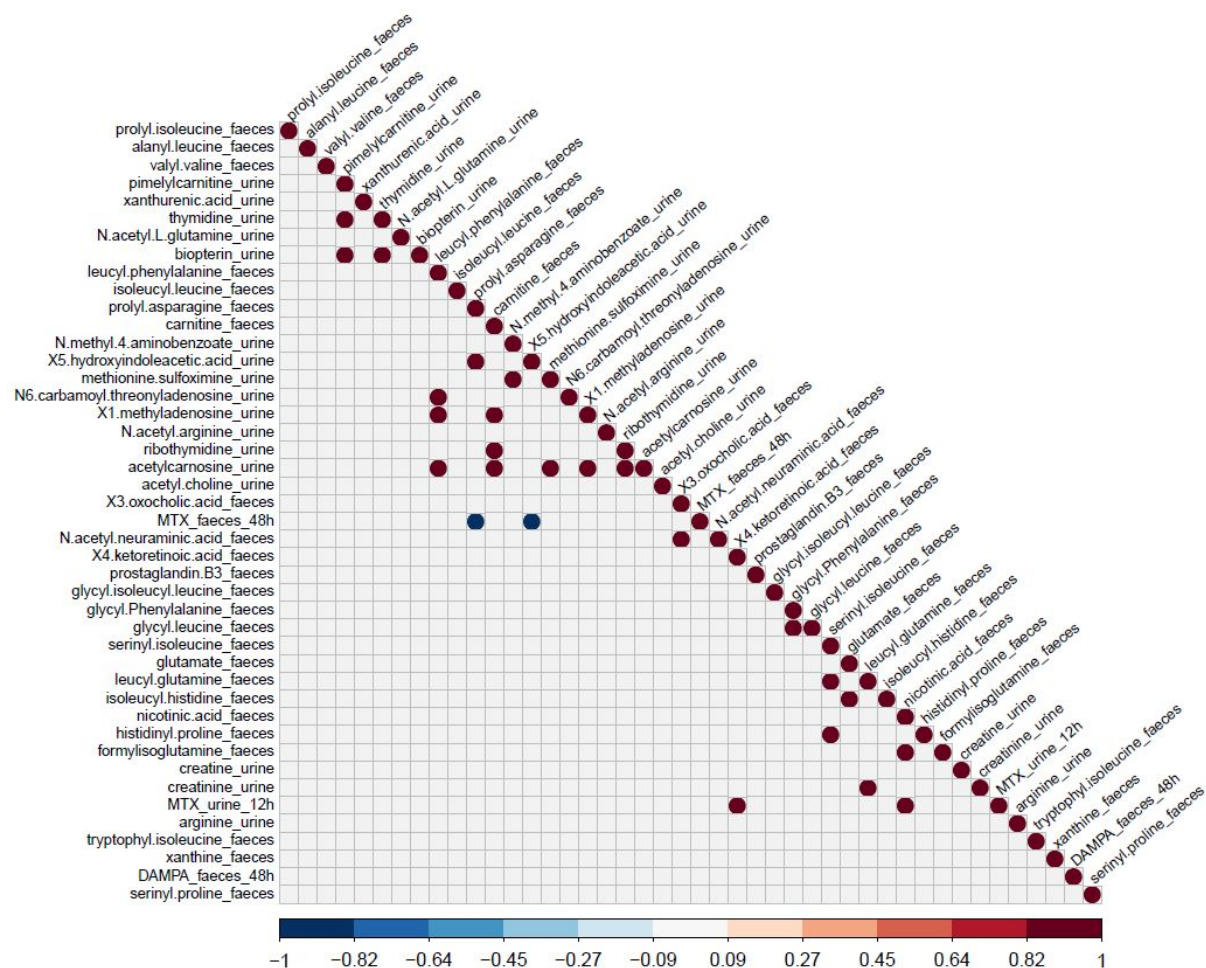

Figure S9. Correlogram integrating the putatively annotated endogenous compounds excreted in urine and feces samples of the animals pre-MTX treatment with MTX concentration measured in urine at 6-12 h and in feces at 36-48 h, as well as the quantity of DAMPA excreted in feces samples at 36-48 h. Represents the significant correlations only ( $p < 0.05$ ) showing negative correlations for 5-hydroxyindole acetic acid in urine samples of the animals pre-MTX treatment with MTX excretion in feces at 48h. N = 3 animals.



**Table S1.** Number of reads per samples after 16S rRNA gene sequencing pre-processing and prior importation into phyloseq for data investigation.

| SAMPLE ID | READS<br>COUNT |
|-----------|----------------|
| 10_C_01   | 13189          |
| 10_C_02   | 13680          |
| 11_C_01   | 13129          |
| 11_C_02   | 6182           |
| 11_C_04   | 15638          |
| 11_C_08   | 12801          |
| 12_C_01   | 16269          |
| 13_D_04   | 15603          |
| 14_D_01   | 17043          |
| 14_D_02   | 17909          |
| 14_D_08   | 14648          |
| 15_D_02   | 16451          |
| 16_D_02   | 15168          |
| 16_D_08   | 11959          |

|         |       |
|---------|-------|
| 17_E_01 | 12937 |
| 17_E_02 | 19481 |
| 17_E_08 | 10813 |
| 18_E_01 | 15943 |
| 18_E_08 | 14209 |
| 19_E_01 | 15241 |
| 19_E_08 | 16935 |
| 1_A_08  | 15753 |
| 20_E_01 | 19037 |
| 20_E_02 | 14600 |
| 21_F_01 | 16923 |
| 21_F_02 | 18220 |
| 22_F_01 | 18429 |
| 22_F_08 | 17227 |
| 23_F_01 | 18852 |
| 23_F_02 | 18097 |
| 23_F_08 | 18209 |
| 24_F_01 | 17406 |
| 24_F_02 | 4406  |
| 25_G_01 | 15517 |
| 25_G_02 | 16624 |

|         |       |         |       |
|---------|-------|---------|-------|
| 25_G_04 | 17014 | 33_I_08 | 18292 |
| 25_G_08 | 6745  | 34_I_01 | 18632 |
| 26_G_01 | 18234 | 34_I_02 | 14898 |
| 26_G_02 | 18370 | 35_I_01 | 11371 |
| 27_G_01 | 11336 | 35_I_02 | 12434 |
| 27_G_04 | 13117 | 35_I_04 | 17798 |
| 28_G_01 | 17482 | 35_I_08 | 16482 |
| 28_G_02 | 15805 | 36_I_01 | 13159 |
| 29_H_01 | 12397 | 36_I_02 | 14176 |
| 29_H_04 | 14809 | 36_I_08 | 17722 |
| 29_H_08 | 11919 | 37_I_01 | 10524 |
| 2_A_02  | 18056 | 37_I_02 | 13151 |
| 2_A_08  | 15282 | 38_I_01 | 14775 |
| 30_U_01 | 16765 | 38_I_02 | 13278 |
| 30_U_02 | 21982 | 39_J_02 | 10433 |
| 31_H_01 | 15485 | 3_A_02  | 11592 |
| 31_H_08 | 12619 | 40_J_01 | 17328 |
| 32_H_01 | 13381 | 40_J_02 | 15795 |
| 32_H_02 | 12724 | 41_J_01 | 12942 |
| 33_I_02 | 14062 | 41_J_02 | 14064 |
| 33_I_04 | 13899 | 42_J_01 | 17428 |

|         |       |
|---------|-------|
| 42_J_02 | 18626 |
| 42_J_08 | 19071 |
| 43_J_01 | 12622 |
| 43_J_04 | 11234 |
| 44_J_01 | 24371 |
| 44_J_02 | 14249 |
| 4_A_01  | 17464 |
| 4_A_02  | 13804 |
| 5_B_01  | 12107 |
| 5_B_02  | 15130 |
| 5_B_04  | 14601 |
| 5_B_08  | 15550 |
| 6_B_01  | 18907 |

|                  |     |       |
|------------------|-----|-------|
| 7_B_02           |     | 15476 |
| 8_B_01           |     | 17688 |
| 8_B_02           |     | 12730 |
| 8_B_08           |     | 21445 |
| 9_C_01           |     | 11312 |
| 9_C_04           |     | 10702 |
| 9_C_08           |     | 15240 |
| BLANK-P1         | 181 | 53    |
| BLANK-P2         | 257 | 71    |
| BLANK-P3-V1      | 248 | 80    |
| BLANK-P3-V2      | 324 | 23    |
| POSITIVE-CONTROL |     | 23749 |
| 30404            |     |       |

**Table S2.** Putative annotations for metabolites detected in the urine samples. The database reference number of each putative annotation is indicated, as well as if the matching was done with as spectra coming from real measurements or in silico calculation, and finally if validation of the annotation by MS/MS or DDA is reported as well as matches with the NPC database. Confidence of annotation are indicated in ID level. Frag = fragment; theo = theoretical; obs = observed.

| putative ID                       | Adduct              | formula                                                        | ID level | m/z      | Calculated mass | frag 1 theo | frag 2 theo | frag 3 theo | frag 4 theo | frag 1 obs | frag 2 obs | frag 3 obs | frag 4 obs | RT (mins) | Database     | In silico or exp | MS/MS or DDA | NPC DB |
|-----------------------------------|---------------------|----------------------------------------------------------------|----------|----------|-----------------|-------------|-------------|-------------|-------------|------------|------------|------------|------------|-----------|--------------|------------------|--------------|--------|
| arginine                          | [M+H] <sup>+</sup>  | C <sub>6</sub> H <sub>14</sub> N <sub>4</sub> O <sub>2</sub>   | 2a       | 175.0828 | 175.1187        | 158.093     | 130.098     | 116.071     | 112.087     | 158.057    | 130.053    | /          | 112.056    | 0.61      | Metlin 13    | ESI Q-TOF        | Yes          | Yes    |
| creatinine                        | [M+Na] <sup>+</sup> | C <sub>4</sub> H <sub>7</sub> N <sub>3</sub> O                 | 2a       | 136.0504 | 136.0481        | 114.069     | 86.0741     | /           | /           | 114.068    | 86.0722    | /          | /          | 0.65      | Metlin 8     | ESI Q-TOF        | /            | Yes    |
| creatine                          | [M+H] <sup>+</sup>  | C <sub>4</sub> H <sub>9</sub> N <sub>3</sub> O <sub>2</sub>    | 2a       | 132.0786 | 132.0768        | 114.066     | 90.0555     | 87.0557     | /           | 114.068    | 90.0568    | 87.0566    | /          | 0.67      | Metlin 7     | ESI Q-TOF        | Yes          | Yes    |
| acetyl choline                    | [M+H] <sup>+</sup>  | C <sub>7</sub> H <sub>15</sub> N <sub>2</sub> O                | 2a       | 146.12   | 146.118         | 87.0448     | 64.0165     | 60.0818     | /           | 87.0459    | /          | 60.0826    | /          | 0.69      | Metlin 57    | ESI Q-TOF        | /            | Yes    |
| ribothymidine                     | [M+Na] <sup>+</sup> | C <sub>10</sub> H <sub>14</sub> N <sub>2</sub> O <sub>6</sub>  | 2b       | 281.0753 | 281.0744        | 259.093     | 133.048     | 127.05      | 110.023     | 259.094    | 133.052    | 127.052    | /          | 0.95      | Metlin 85160 | ESI Q-TOF        | Yes          | /      |
| N-acetyl-L-glutamine              | [M+Na] <sup>+</sup> | C <sub>7</sub> H <sub>12</sub> N <sub>2</sub> O <sub>4</sub>   | 2a       | 211.0711 | 211.0689        | 189.087     | 172.06      | 130.05      | 84.0444     | 189.089    | 172.061    | 130.052    | 84.045     | 1.07      | Metlin 58344 | ESI Q-TOF        | Yes          | Yes    |
| acetylcarnosine                   | [M+Na] <sup>+</sup> | C <sub>11</sub> H <sub>16</sub> N <sub>4</sub> O <sub>4</sub>  | 2b       | 291.1070 | 291.1064        | 269.124     | 251.114     | 209.058     | 156.077     | 269.126    | 251.115    | 209.058    | 156.077    | 1.08      | HMDB0012881  | In silico        | Yes          | /      |
| N-acetyl-arginine                 | [M+H] <sup>+</sup>  | C <sub>8</sub> H <sub>16</sub> N <sub>4</sub> O <sub>3</sub>   | 2b       | 217.1320 | 217.1298        | 200.103     | 175.117     | 158.083     | /           | 200.105    | 175.12     | 158.084    | /          | 1.08      | Metlin 58241 | ESI Q-TOF        | Yes          | /      |
| 1-methyladenosine                 | [M+H] <sup>+</sup>  | C <sub>11</sub> H <sub>15</sub> N <sub>5</sub> O <sub>4</sub>  | 2b       | 282.1216 | 282.1200        | 264.109     | 206.067     | 150.077     | /           | /          | 206.019    | 150.08     | /          | 1.40      | Metlin 6888  | ESI Q-TOF        | Yes          | /      |
| biopterin                         | [M+Na] <sup>+</sup> | C <sub>9</sub> H <sub>11</sub> N <sub>5</sub> O <sub>3</sub>   | 2b       | 260.078  | 260.075         | 238.094     | 220.083     | 194.068     | 178.073     | 238.096    | 220.085    | 194.069    | 178.073    | 1.58      | Metlin 247   | ESI Q-TOF        | Yes          | /      |
| thymidine                         | [M+H] <sup>+</sup>  | C <sub>10</sub> H <sub>14</sub> N <sub>2</sub> O <sub>5</sub>  | 2a       | 265.0830 | 265.0795        | 243.114     | 127.05      | 117.055     | 99.0439     | 243.056    | 127.054    | 117.057    | /          | 2.25      | Metlin 3375  | ESI Q-TOF        | /            | Yes    |
| xanthurenic acid                  | [M+H] <sup>+</sup>  | C <sub>10</sub> H <sub>7</sub> N <sub>2</sub> O <sub>4</sub>   | 2b       | 206.048  | 206.044         | 188.034     | 178.046     | 160.038     | 132.044     | 188.074    | 178.053    | 160.042    | 132.082    | 2.97      | Metlin 5841  | ESI Q-TOF        | Yes          | /      |
| N6-carbamoyl-L-threonyl-adenosine | [M+Na] <sup>+</sup> | C <sub>15</sub> H <sub>20</sub> N <sub>6</sub> O <sub>8</sub>  | 2b       | 435.1255 | 435.1235        | 413.142     | 281.099     | 136.062     | 102.016     | 413.143    | 281.101    | 136.064    | 102.055    | 3.14      | Metlin 95993 | In silico        | Yes          | /      |
| pimelylcarnitine                  | [M+H] <sup>+</sup>  | C <sub>14</sub> H <sub>25</sub> N <sub>2</sub> O <sub>6</sub>  | 2b       | 304.178  | 304.176         | 286.165     | 268.154     | 258.17      | 240.159     | 286.174    | 268.11     | 258.18     | 239.997    | 3.15      | HMDB0013328  | In silico        | Yes          | /      |
| methionine sulfoximine            | [M+H] <sup>+</sup>  | C <sub>5</sub> H <sub>12</sub> N <sub>2</sub> O <sub>3</sub> S | 2b       | 181.0630 | 181.0640        | 163.038     | 135.059     | 118.032     | 102.055     | 163.052    | 135.058    | 118.066    | 102.016    | 3.20      | Metlin 65992 | ESI Q-TOF        | Yes          | /      |
| 5-Hydroxyindoleacetic acid        | [M+H] <sup>+</sup>  | C <sub>10</sub> H <sub>9</sub> N <sub>2</sub> O <sub>3</sub>   | 2b       | 192.0676 | 192.0637        | 146.06      | 110.009     | /           | /           | 146.063    | 110.011    | /          | /          | 3.54      | Metlin 2975  | ESI Q-TOF        | Yes          | /      |
| N-Methyl-4-aminobenzoate          | [M+H] <sup>+</sup>  | C <sub>8</sub> H <sub>9</sub> N <sub>2</sub> O <sub>2</sub>    | 2b       | 152.0720 | 152.0710        | 134.0600    | 108.0810    | 106.0650    | 104.0490    | 134.0616   | 108.0823   | 106.0653   | 104.0100   | 3.66      | Metlin 65994 | In silico        | Yes          | /      |



**Table S3.** Putative annotations for metabolites detected in the faecal samples. The database reference number of each putative annotation is indicated, as well as if the matching was done with as spectra coming from real measurements or in silico calculation, and finally if validation of the annotation by MS/MS or DDA is reported as well as matches with the NPC database. Confidence of annotation are indicated in ID level. **Frag = fragment; theo = theoretical; obs = observed**

| putative ID              | adduct             | formula                                                       | ID level | <i>m/z</i> | Calculated mass | frag 1 theo | frag 2 theo | frag 3 theo | frag 4 theo | frag 1 obs | frag 2 obs | frag 3 obs | frag 4 obs | RT (mins) | Database     | In silico or exp | MS/MS or DDA | NPC DB |
|--------------------------|--------------------|---------------------------------------------------------------|----------|------------|-----------------|-------------|-------------|-------------|-------------|------------|------------|------------|------------|-----------|--------------|------------------|--------------|--------|
| carnitine                | [M+H] <sup>+</sup> | C <sub>7</sub> H <sub>15</sub> NO <sub>3</sub>                | 2a       | 162.113    | 162.113         | 103.04      | 102.092     | 85.0291     | 60.0821     | 103.04     | 102.055    | 85.048     | 60.081     | 0.62      | Metlin 52    | ESI Qtof         | Yes          | Yes    |
| prolyl-asparagine        | [M+H] <sup>+</sup> | C <sub>9</sub> H <sub>15</sub> N <sub>3</sub> O <sub>4</sub>  | 2b       | 230.113    | 230.114         | 213.087     | 195.076     | 133.061     | 98.06       | 213.089    | 195.078    | 133.061    | 98.0602    | 0.65      | Metlin 85910 | In silico        | Yes          | /      |
| N-acetyl-neuraminic acid | [M+H] <sup>+</sup> | C <sub>11</sub> H <sub>19</sub> NO <sub>9</sub>               | 2a       | 310.12     | 310.12          | 292.106     | 274.093     | 232.083     | 108.044     | 292.102    | 274.091    | 232.083    | 108.049    | 0.66      | Metlin 24101 | ESI Qtof         | Yes          | Yes    |
| formylisoglutamine       | [M+H] <sup>+</sup> | C <sub>6</sub> H <sub>10</sub> N <sub>2</sub> O <sub>4</sub>  | 2b       | 175.073    | 175.071         | 157.061     | 147.076     | 139.05      | 130.05      | 157.062    | 147.077    | 139.057    | 130.051    | 0.66      | Metlin 63495 | In silico        | Yes          | /      |
| histidinyl-proline       | [M+H] <sup>+</sup> | C <sub>11</sub> H <sub>16</sub> N <sub>4</sub> O <sub>3</sub> | 2b       | 253.128    | 253.13          | 235.119     | 138.066     | 116.071     | 110.071     | 235.118    | 138.056    | 116.071    | 110.075    | 0.67      | Metlin 85799 | In silico        | Yes          | /      |
| serinyl-proline          | [M+H] <sup>+</sup> | C <sub>8</sub> H <sub>14</sub> N <sub>2</sub> O <sub>4</sub>  | 2b       | 203.099    | 203.103         | 185.092     | 171.076     | 157.097     | 116.071     | 185.088    | 171.076    | 157.092    | 116.072    | 1.05      | Metlin 85940 | In silico        | Yes          | /      |
| nicotinic acid           | [M+H] <sup>+</sup> | C <sub>6</sub> H <sub>5</sub> NO <sub>2</sub>                 | 2b       | 124.04     | 124.039         | 106.029     | 80.0501     | 78.0344     | /           | 106.048    | 80.05      | 78.034     | /          | 1.11      | Metlin 240   | ESI Qtof         | Yes          | /      |
| xanthine                 | [M+H] <sup>+</sup> | C <sub>5</sub> H <sub>4</sub> N <sub>4</sub> O <sub>2</sub>   | 2b       | 153.041    | 153.04          | 136.013     | 110.035     | 82.0402     | /           | 136.015    | 110.035    | 82.041     | /          | 1.45      | Metlin 82    | ESI Qtof         | Yes          | /      |

|                          |                    |                                                               |    |             |         |             |             |             |             |             |             |             |             |      |               |                   |     |     |
|--------------------------|--------------------|---------------------------------------------------------------|----|-------------|---------|-------------|-------------|-------------|-------------|-------------|-------------|-------------|-------------|------|---------------|-------------------|-----|-----|
| isoleucyl-histidine      | [M+H] <sup>+</sup> | C <sub>12</sub> H <sub>20</sub> N <sub>4</sub> O <sub>3</sub> | 2b | 269.15<br>9 | 269.161 | 251.15      | 223.15<br>5 | 156.07<br>7 | 114.09<br>1 | 251.14<br>6 | 223.15<br>7 | 156.07<br>6 | /           | 1.47 | Metlin 85815  | In<br>sillic<br>o | Yes | /   |
| leucyl-glutamine         | [M+H] <sup>+</sup> | C <sub>11</sub> H <sub>21</sub> N <sub>3</sub> O <sub>4</sub> | 2b | 260.16      | 260.16  | 243.13<br>4 | 147.07<br>7 | 130.05      | 86.096<br>4 | 243.13<br>3 | 147.07<br>6 | 130.05      | 86.096<br>3 | 1.61 | Metlin 85831  | In<br>sillic<br>o | Yes | /   |
| glutamate                | [M+H] <sup>+</sup> | C <sub>5</sub> H <sub>9</sub> NO <sub>4</sub>                 | 2b | 148.06      | 148.061 | 130.05      | 105.95<br>4 | 102.05<br>5 | 84.044<br>6 | 130.04      | 105.94<br>7 | 102.05<br>3 | 84.044<br>5 | 1.77 | Metlin 19     | ESI<br>Qtof       | Yes | /   |
| valyl-valine             | [M+H] <sup>+</sup> | C <sub>10</sub> H <sub>20</sub> N <sub>2</sub> O <sub>3</sub> | 2a | 217.15<br>5 | 217.155 | 199.14<br>4 | 171.14<br>9 | 118.08<br>6 | 100.07<br>6 | 199.14<br>4 | 171.14<br>9 | 118.08<br>6 | /           | 2.09 | Metlin 86032  | In<br>sillic<br>o | Yes | Yes |
| alanyl-leucine           | [M+H] <sup>+</sup> | C <sub>9</sub> H <sub>18</sub> N <sub>2</sub> O <sub>3</sub>  | 2a | 203.13<br>9 | 203.142 | 185.13<br>1 | 157.13<br>6 | 132.10<br>4 | 86.097<br>9 | 185.12<br>8 | 157.13<br>4 | 132.10<br>2 | 86.096<br>6 | 2.3  | Metlin 442668 | ESI<br>Qtof       | Yes | Yes |
| serinyl-isoleucine       | [M+H] <sup>+</sup> | C <sub>9</sub> H <sub>18</sub> N <sub>2</sub> O <sub>4</sub>  | 2b | 219.13<br>4 | 219.134 | 201.12<br>3 | 173.12<br>8 | 132.10<br>2 | 60.044<br>4 | 201.12<br>4 | 173.12<br>9 | 132.10<br>2 | 60.044<br>7 | 2.35 | Metlin 85935  | In<br>sillic<br>o | Yes | /   |
| glycyl-leucine           | [M+H] <sup>+</sup> | C <sub>8</sub> H <sub>16</sub> N <sub>2</sub> O <sub>3</sub>  | 2b | 189.12<br>5 | 189.123 | 171.11<br>3 | 143.11<br>8 | 132.10<br>2 | 86.096<br>4 | 171.11<br>3 | 143.11<br>9 | 132.10<br>3 | 86.097<br>3 | 2.5  | Metlin 5727   | In<br>sillic<br>o | Yes | /   |
| prolyl-isoleucine        | [M+H] <sup>+</sup> | C <sub>11</sub> H <sub>20</sub> N <sub>2</sub> O <sub>3</sub> | 2b | 229.15<br>1 | 229.152 | 183.14<br>7 | 70.064<br>5 | /           | /           | 183.14<br>3 | /           | /           | /           | 2.78 | Metlin 23879  | ESI<br>Qtof       | Yes | /   |
| glycyl-Phenylalanine     | [M+H] <sup>+</sup> | C <sub>11</sub> H <sub>14</sub> N <sub>2</sub> O <sub>3</sub> | 2b | 223.10<br>3 | 223.108 | 177.10<br>2 | 166.08<br>6 | 120.08<br>1 | 103.05<br>4 | 177.1       | 106.08<br>1 | 120.07<br>7 | 103.05<br>3 | 2.9  | Metlin 85758  | In<br>sillic<br>o | Yes | /   |
| isoleucyl-leucine        | [M+H] <sup>+</sup> | C <sub>12</sub> H <sub>24</sub> N <sub>2</sub> O <sub>3</sub> | 2b | 245.18<br>6 | 245.186 | 227.17<br>5 | 199.18      | 132.10<br>2 | 114.09<br>1 | 227.17<br>6 | 199.18      | 132.10<br>2 | 114.09<br>7 | 3.45 | Metlin 85817  | In<br>sillic<br>o | Yes | /   |
| glycyl-isoleucyl-leucine | [M+H] <sup>+</sup> | C <sub>14</sub> H <sub>27</sub> N <sub>3</sub> O <sub>4</sub> | 2b | 302.20<br>5 | 302.204 | 171.10<br>9 | 143.11<br>4 | 132.09<br>9 | /           | 171.10<br>7 | 143.11<br>3 | 132.09<br>5 | /           | 3.76 | Metlin 23190  | ESI<br>Qtof       | Yes | /   |
| leucyl-phenylalanine     | [M+H] <sup>+</sup> | C <sub>15</sub> H <sub>22</sub> N <sub>2</sub> O <sub>3</sub> | 2b | 279.17<br>0 | 279.17  | 233.16<br>5 | 132.10<br>2 | 120.08<br>1 | 103.05<br>4 | 233.15<br>5 | 132.10<br>2 | 120.08<br>1 | 103.05<br>5 | 4.12 | Metlin 85839  | In<br>sillic<br>o | Yes | /   |

|                       |                    |                                                               |    |             |         |             |             |             |             |             |             |             |             |      |                 |                   |     |   |
|-----------------------|--------------------|---------------------------------------------------------------|----|-------------|---------|-------------|-------------|-------------|-------------|-------------|-------------|-------------|-------------|------|-----------------|-------------------|-----|---|
| tryptophyl-isoleucine | [M+H] <sup>+</sup> | C <sub>17</sub> H <sub>23</sub> N <sub>3</sub> O <sub>3</sub> | 2b | 318.18<br>2 | 318.181 | 301.15<br>5 | 272.17<br>6 | 159.09<br>2 | 132.10<br>2 | 301.15<br>6 | 272.18<br>2 | 159.09<br>3 | 132.10<br>3 | 5.02 | Metlin 85979    | In<br>sillic<br>o | Yes | / |
| prostaglandin B3      | [M+H] <sup>+</sup> | C <sub>20</sub> H <sub>28</sub> O <sub>4</sub>                | 2b | 333.20<br>2 | 333.205 | 315.19<br>5 | 197.18<br>4 | 171.11<br>2 | 157.09<br>9 | 315.19<br>8 | 297.17<br>6 | 171.11<br>2 | 157.1       | 6.81 | Metlin 36190    | ESI<br>Qtof       | Yes | / |
| 4-ketoretinoic acid   | [M+H] <sup>+</sup> | C <sub>20</sub> H <sub>26</sub> O <sub>3</sub>                | 2b | 315.19<br>7 | 315.196 | 297.18<br>5 | 269.19<br>1 | 251.18      | 149.09<br>7 | 297.18<br>3 | 269.19      | 251.17<br>9 | /           | 8.36 | HMDB000628<br>5 | In<br>sillic<br>o | Yes | / |
| 3-oxocholic acid      | [M+H] <sup>+</sup> | C <sub>24</sub> H <sub>38</sub> O <sub>5</sub>                | 2b | 407.28<br>1 | 407.279 | 389.26<br>9 | 371.25<br>8 | 347.25<br>8 | 343.26<br>3 | 389.26<br>9 | 371.26      | /           | 343.26<br>4 | 8.62 | Metlin 57908    | In<br>sillic<br>o | Yes | / |

**Table S4.**  $\alpha$  diversity values representing the microbial richness of each of the faecal samples of the animals according the MTX dose groups over time. The diversity is assessed using the Inverse Simpson index. Low numbers of samples due to diarrhoea and other limitations due to study design do not allow statistical tests between the  $\alpha$  diversity of the different groups to be performed.

|                              | <i>MTX<br/>dose</i> | <i>Time point</i> |       |       |
|------------------------------|---------------------|-------------------|-------|-------|
|                              |                     | 0h                | 12h   | 48h   |
| <i>Number of<br/>samples</i> | 0                   | 14.94             | 14.47 | 15.39 |
|                              | 10                  | 15.63             | 19.36 | 10.56 |
|                              | 40                  | 12.30             | 9.66  | 11.18 |
|                              | 100                 | 11.08             | 7.53  | 4.94  |
|                              | 0                   | 4                 | 2     | 2     |
|                              | 10                  | 5                 | 3     | 2     |
|                              | 40                  | 7                 | 1     | 3     |
|                              | 100                 | 6                 | 2     | 2     |
